# Supplementary material for: Evaluating Back-to-Back and Day-to-Day Reproducibility of Cortical GABA+ Measurements Using Proton Magnetic Resonance Spectroscopy (1H MRS)
Source: MDPI journal article supplement (doi:10.3390/ijms24097713), 2023-04-23
Supplement: s1 [file s1]

**Table S2 Supplemental. GABA+ concentrations and quality parameters in dIPFC.** M, mean; SD, standard deviation; FWHM, i.u.; international units; frequency width at half-maximum; SNR, signal-to-noise ratio; Hz, hertz; S, scan; D, day.

| <b>Parameters<br/>M (SD)</b> | <b>S1D1<br/>(n = 24)</b> | <b>S2D1<br/>(n = 24)</b> | <b>S1D2<br/>(n = 25)</b> | <b>S2D2<br/>(n = 25)</b> | <b>Day 1 Averages<br/>(n = 23)</b> | <b>Day 2 Averages<br/>(n = 23)</b> |
|------------------------------|--------------------------|--------------------------|--------------------------|--------------------------|------------------------------------|------------------------------------|
| GABA+ (i.u.)                 | 1.24 (0.17)              | 1.22 (0.14)              | 1.23 (0.18)              | 1.27 (0.18)              | 1.23 (0.15)                        | 1.26 (0.15)                        |
| GABA+ FWHM (Hz)              | 20.55 (1.72)             | 20.50 (1.54)             | 20.19 (1.53)             | 20.40 (1.72)             | 20.46 (1.29)                       | 20.36 (1.25)                       |
| H <sub>2</sub> O FWHM (Hz)   | 12.16 (1.36)             | 1.91 (1.08)              | 12.25 (1.22)             | 11.66 (0.99)             | 11.99 (1.03)                       | 11.70 (1.05)                       |
| GABA+ Fit Error%             | 5.15 (1.45)              | 5.21 (1.15)              | 5.37 (1.51)              | 5.23 (0.93)              | 5.09 (1.03)                        | 5.30 (1.02)                        |
| H <sub>2</sub> O Fit Error % | 0.73 (0.13)              | 0.69 (0.11)              | 0.73 (0.15)              | 0.71 (0.13)              | 0.71 (0.11)                        | 0.72 (0.13)                        |
| GABA+ SNR                    | 13.85 (2.62)             | 13.03 (1.94)             | 13.53 (2.11)             | 13.24 (1.82)             | 13.36 (2.14)                       | 13.42 (1.78)                       |
| H <sub>2</sub> O SNR         | 15047.37 (5491.52)       | 14982.63 (5105.4)        | 13539.57 (4754.51)       | 14625.55 (5487.87)       | 15215.34 (5213.69)                 | 14031.84 (5068.51)                 |
