# Supplementary material for: Evaluating Back-to-Back and Day-to-Day Reproducibility of Cortical GABA+ Measurements Using Proton Magnetic Resonance Spectroscopy (1H MRS)
Source: MDPI journal article supplement (doi:10.3390/ijms24097713), 2023-04-23
Supplement: s1 [file s1]

**Table S1 Supplemental. GABA+ concentrations and quality parameters in dmPFC/ACC.** M, mean; SD, standard deviation; i.u., international units; FWHM, frequency width at half-maximum; SNR, signal-to-noise ratio; Hz, hertz; S, scan; D, day.

| <b>Parameters<br/>M (SD)</b> | <b>S1D1<br/>(n = 28)</b> | <b>S2D1<br/>(n = 28)</b> | <b>S1D2<br/>(n = 29)</b> | <b>S2D2<br/>(n = 29)</b> | <b>Day 1 averages<br/>(n = 28)</b> | <b>Day 2 averages<br/>(n = 28)</b> |
|------------------------------|--------------------------|--------------------------|--------------------------|--------------------------|------------------------------------|------------------------------------|
| GABA+ (i.u.)                 | 1.90 (0.20)              | 1.91 (0.19)              | 1.88 (0.24)              | 1.94 (0.24)              | 1.90 (0.17)                        | 1.90 (0.22)                        |
| GABA+ FWHM (Hz)              | 20.98 (1.18)             | 21.02 (1.30)             | 21.04 (1.44)             | 21.22 (1.56)             | 21.00 (1.01)                       | 21.03 (1.13)                       |
| H <sub>2</sub> O FWHM (Hz)   | 10.92 (1.20)             | 10.76 (1.13)             | 11.09 (1.15)             | 10.90 (1.06)             | 10.84 (1.15)                       | 10.93 (1.05)                       |
| GABA+ Fit Error%             | 4.71 (1.21)              | 4.99 (1.14)              | 4.86 (1.14)              | 4.99 (0.96)              | 4.85 (1.02)                        | 4.91 (0.79)                        |
| H <sub>2</sub> O Fit Error % | 0.63 (0.09)              | 0.64 (0.08)              | 0.63 (0.08)              | 0.64 (0.07)              | 0.63 (0.08)                        | 0.63 (0.07)                        |
| GABA+ SNR                    | 13.95 (2.94)             | 14.04 (2.84)             | 13.62 (2.16)             | 13.82 (2.04)             | 14.00 (2.64)                       | 13.73 (1.85)                       |
| H <sub>2</sub> O SNR         | 18344.82 (5893.39)       | 18709.42 (6815.02)       | 17716.73 (4776.56)       | 17980.87 (5080.79)       | 18527.12 (6237.01)                 | 17481.71 (4280.53)                 |
