# Supplementary material for: Evaluating Back-to-Back and Day-to-Day Reproducibility of Cortical GABA+ Measurements Using Proton Magnetic Resonance Spectroscopy (1H MRS)
Source: MDPI journal article supplement (doi:10.3390/ijms24097713), 2023-04-23
Supplement: s1 [file s1]

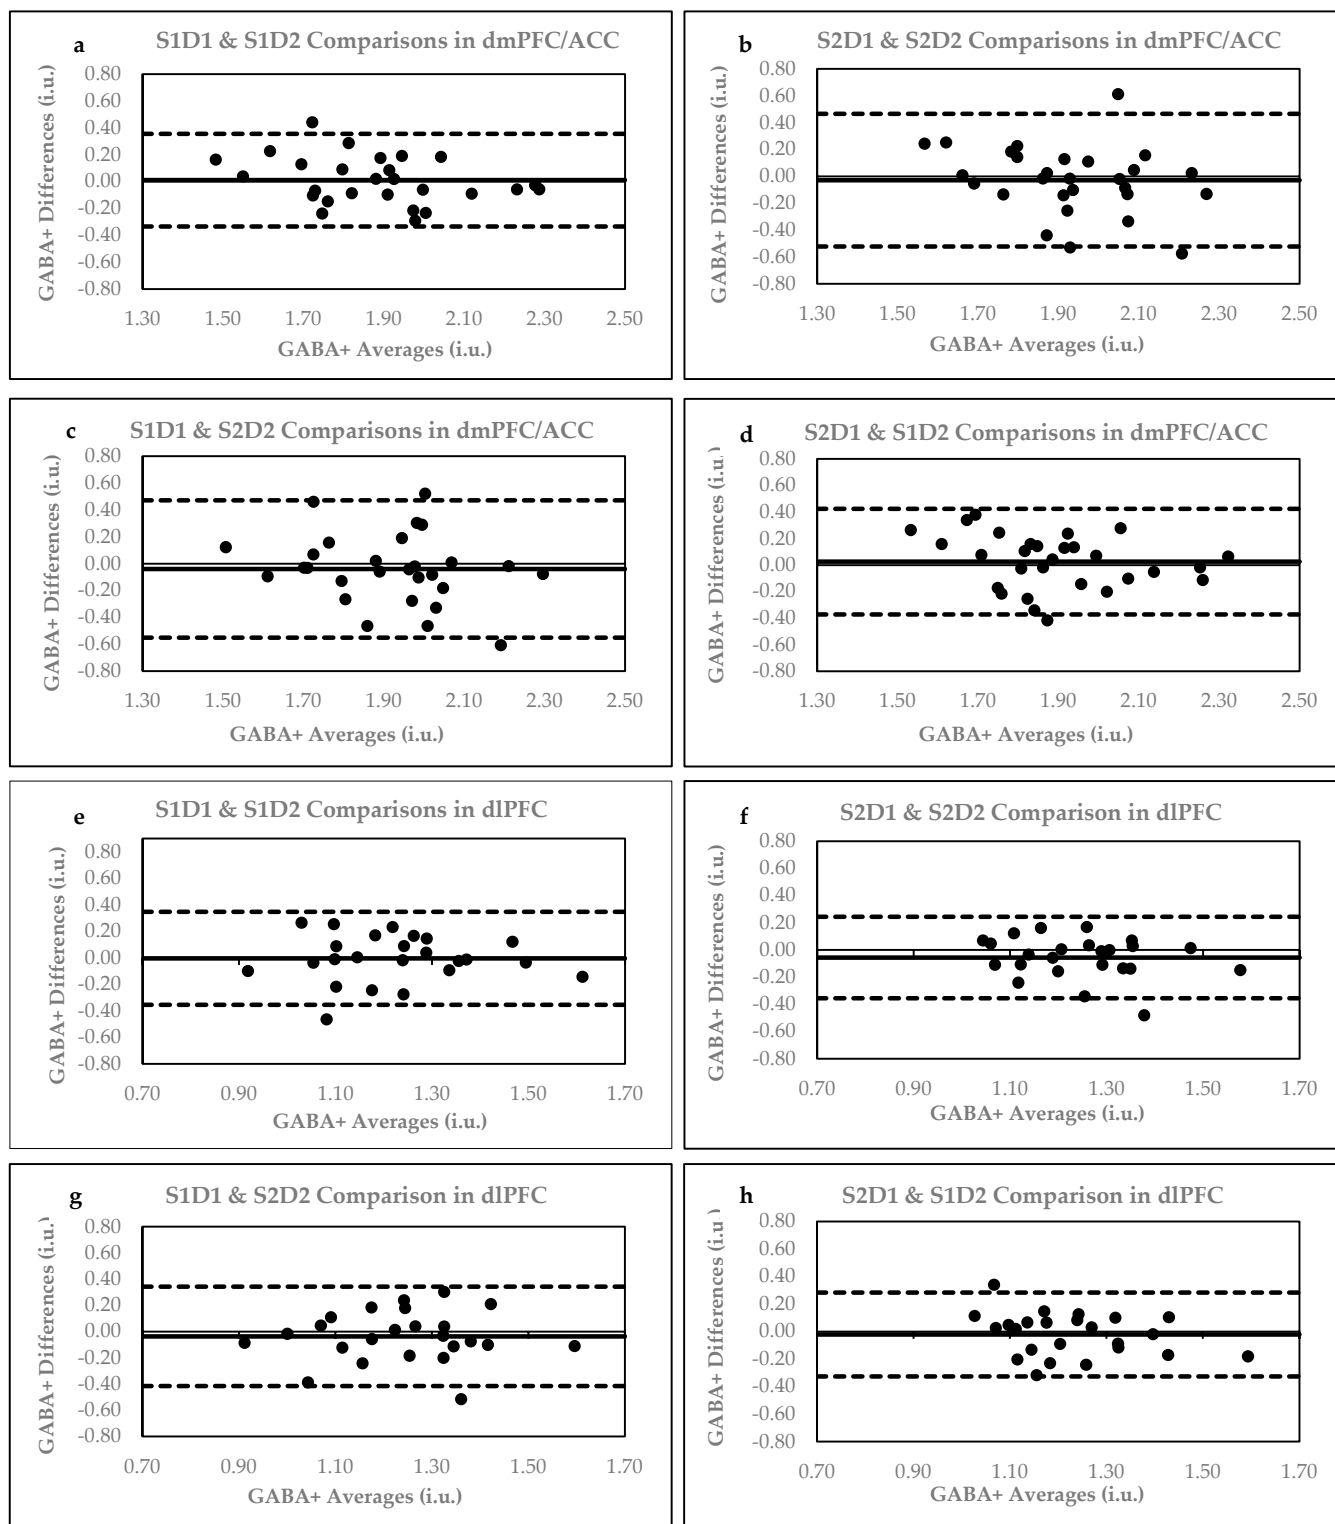

**Figure S2 Supplemental. Bland-Altman plots for D2D comparisons of 5.2-number scans.** a) S1D1 and S1D2 in dmPFC/ACC; b) S2D1 and S2D2 in dmPFC/ACC; c) S1D2 and S2D2 in dmPFC/ACC; d) S2D1 and S1D2 in dmPFC/ACC; e) S1D1 and S1D2 in dlPFC; f) S2D1 and S2D2 in dlPFC; g) S1D2 and S2D2 in dlPFC; h) S2D1 and S1D2 in dlPFC. S, scan; D, day; i.u., international units
